# Supplementary material for: The fitness cost of metallo-β-lactamase expression is a potential target for new therapeutic approaches to carbapenem resistance
Source: Research Square preprint supplement (doi:10.21203/rs.3.rs-3683698/v1), 2023-12-22
Supplement: Supplementary file 1 [file 87c4e4aa7a2c6e08c46fc7ef.xlsx]

## Sheet: Table_S6
Table S6: Exogenous zinc reduces the potency of batimastat, the DegS inhibitor, A22 and azithromycin against VIM-2 expressing bacteria.
Strain		Batimastat (µg/mL)		DegS Inhibitor (µg/mL)		A22 (µg/mL)		Azithromycin (µg/mL)
		M9	M9 + Zn2+	M9	M9 + Zn2+	M9	M9 + Zn2+	M9	M9 + Zn2+
Escherichia coli BW25113	Empty	>64	>64	128	128	128	128	4	4
	VIM-2	16	>64	16	128	2	128	0.5	4
Klebsiella pneumoniae ATCC 43816	Empty	NT	NT	64	64	>64	>64	8	8
	VIM-2	NT	NT	8	64	1	>64	2	8
Klebsiella aerogenes C0064	Empty	NT	NT	>128	>128	NT	NT	NT	NT
	VIM-2	NT	NT	>128	>128	NT	NT	NT	NT
Pseudomonas aeruginosa WCC H1010805*	(VIM-2)	NT	NT	>128	>128	0.5	0.5	16	64
*Clinical isolate expressing a natural VIM-2
NT = not tested

## Sheet: Table_S7
Figure S7: Fold change in growth between E. coli expressing VIM-2 and E. coli carrying the empty vector harbouring CRISPRi constructs
	Gene	0aTC_avg	5aTC_avg	10aTC_avg	50aTC_avg	100aTC_avg	500aTC_avg
1	Empty_Vector	1.16968	1.41916	1.29412	1.31994	1.23942	0.980165
2	psd	1.09425	0.882504	0.855359	0.898671	0.778997	1.00896
3	lptA	1.01104	1.97495	0.78809	1.20793	1.51999	0.397147
4	aceF	1.02467	3.18757	1.83523	1.7357	1.41855	0.652921
5	lptB	0.93311	2.35073	0.592269	1.22894	0.600328	0.334958
6	alaS	1.02194	1.46644	0.861129	1.39056	1.25638	0.459599
7	lptC	1.15192	1.89499	1.09955	1.17564	0.843584	0.478201
8	argS	0.897008	2.28125	0.894783	0.881891	1.1816	0.582525
9	lptE	0.856811	1.08222	1.29375	1.1429	0.789744	0.335085
10	asd	0.776314	1.13931	1.18354	0.883968	0.35033	0.392607
11	lptF	0.839293	2.77329	2.16969	0.630341	1.80232	0.313319
12	asnS	0.901939	1.623	1.18203	1.49673	1.0462	0.328364
13	lptG	0.743299	0.258795	0.494654	1.32338	1.87337	0.513578
14	aspS	0.879574	0.861379	1.24557	1.22693	0.891789	0.469539
15	lolA	1.04692	1.42933	1.53616	9.57865	10.4397	1.1239
16	birA	1.17114	1.28528	1.22022	1.25914	1.14219	1.63668
17	lolB	1.05756	1.29512	1.39541	0.591965	0.782345	0.264367
18	cca	1.13977	1.08808	0.899154	0.620887	0.472062	0.624222
19	lolC	1.05458	2.54477	3.92265	1.33727	0.970322	0.256359
20	coaA	1.05352	0.993599	1.13574	0.743126	1.09306	0.552075
21	lolD	1.09656	0.988222	2.01915	1.3307	1.24229	0.289635
22	cohE	0.850496	1.0098	0.940827	1.16564	1.12585	1.81941
23	lolE	0.954114	4.1554	0.888946	1.41934	1.34324	0.403486
24	csrA	0.895465	0.224989	0.168592	1.28513	0.948001	0.54843
25	leuS	0.891991	1.24684	2.30807	1.35842	0.933431	1.11847
26	yqeL	0.783899	1.00159	0.968346	0.182255	0.161959	0.881755
27	ligA	0.779734	0.920218	1.22419	0.387134	0.369715	0.365592
28	yqgF	1.43977	1.43161	1.51446	1.20037	0.743624	0.568606
29	lipA	0.749239	1.27276	2.31993	1.21135	2.48932	0.473245
30	ymfE	0.811272	0.937898	0.99928	1.0607	1.00674	1.26817
31	lnt	0.771093	1.24648	1.97992	0.910206	1.21367	0.309367
32	yjbS	1.03225	1.03088	1.10492	1.01718	1.07757	1.21318
33	lpd	0.838319	3.20714	3.23963	1.25871	1.37051	0.581012
34	lptD	0.901332	0.950506	1.20659	0.760501	0.530936	0.533553
35	lysS	0.800973	0.703132	0.754562	0.652291	0.574736	0.660446
36	rpsP	0.811196	1.91826	0.959861	1.22054	0.871176	0.288226
37	map	0.837545	0.702067	0.987838	0.735568	0.797304	0.764571
38	rpsQ	1.36014	0.415168	0.181345	0.981709	1.17145	0.493756
39	metG	0.88774	2.55725	1.22148	0.94272	1.43393	0.312381
40	fbaA	0.980973	1.48643	3.47256	1.28118	1.16472	0.378207
41	metK	0.80898	0.919774	1.46416	0.830277	1.08179	0.401612
42	rpsR	0.888625	0.66728	2.21843	1.29803	2.4632	0.322303
43	mnmA	0.902308	0.850563	1.01669	1.69484	1.76722	0.315287
44	acpP	0.928895	0.612323	0.413158	1.13607	1.65554	0.413039
45	Empty_Vector	0.921981	1.00721	0.904504	1.05755	1.01733	1.63357
46	rpsT	1.08682	1.06213	1.13806	1.12997	1.20779	0.317698
47	mrdB	0.967604	0.809309	0.603514	0.156855	0.121978	0.331812
48	rpsU	1.00115	1.02367	0.84301	1.61347	1.37462	0.685223
49	msbA	1.43103	5.00163	3.29332	1.00321	0.900695	0.749808
50	cydA	1.01598	1.04991	0.954686	0.928802	0.56911	1.14501
51	Empty_Vector	0.845178	0.970145	1.04627	0.837786	0.746659	0.898952
52	cdsA	0.886262	0.864998	0.668346	1.16477	0.345164	0.25108
53	waaA	0.975413	1.05593	0.870273	1.18409	0.472372	0.337435
54	cydB	1.46926	1.48513	1.53206	1.61164	1.68376	3.20849
55	waaU	0.84099	0.895837	0.995839	0.868123	0.833933	1.09135
56	cydC	1.09356	1.06024	0.917023	0.955604	0.9196	1.18243
57	lpxA	0.933018	0.889238	0.664056	1.34654	1.41771	0.311735
58	cydD	0.881663	0.890183	0.820748	0.928504	0.815719	1.30734
59	lpxB	0.963389	1.56049	0.286418	0.694031	0.927668	0.298385
60	cydX	1.08904	0.842859	0.887364	0.863999	0.551461	0.527454
61	lpxC	0.771172	0.724479	0.856432	0.973895	1.74401	0.507013
62	cysS	1.10253	1.30656	0.921873	1.0875	1.81201	0.821432
63	lpxD	0.861087	0.714385	0.820054	0.997202	0.683279	0.334609
64	dapA	0.883222	0.824674	0.961642	0.912345	0.370554	0.482937
65	lpxH	1.03259	0.916676	0.913754	0.865905	0.664451	0.269204
66	fusA	1.30507	1.02185	1.0027	0.997271	0.773079	0.86602
67	lpxK	1.03183	0.805314	0.841357	1.14473	0.917007	0.336157
68	dapE	1.08902	1.75263	2.25701	1.42146	0.898387	0.374323
69	lpxL	1.10209	0.97748	0.896881	1.28006	1.02645	1.69071
70	dapF	1.06995	1.18796	2.03328	0.902016	0.872586	0.500183
71	kdsB	0.0273421	0.0301761	0.0677449	0.463722	0.371101	0.204135
72	dcd	0.936912	0.919778	1.02058	0.612885	0.110781	0.399805
73	zipA	0.948278	0.648354	0.71599	2.36576	1.35207	0.734558
74	rsgA	1.30973	1.47875	1.23905	0.947529	0.635735	0.802072
75	nadD	0.9111	1.09016	1.10784	1.03631	0.72315	0.713616
76	secA	1.13975	0.294274	0.676787	1.85567	1.36721	0.16142
77	nadE	0.939457	0.90726	0.948493	0.545085	0.206417	0.464107
78	secE	0.827578	1.02052	1.18572	0.674683	0.849606	0.486518
79	nadK	1.00771	1.05484	1.36711	1.2926	0.701832	0.399708
80	secY	0.913336	0.498488	0.218607	1.04143	0.955354	0.313921
81	nrdA	0.800561	2.68056	2.23167	1.2537	1.32926	0.428024
82	serS	0.928279	0.583755	1.1211	0.999934	0.832994	0.257173
83	nrdB	0.88621	0.698987	1.08759	1.14071	0.586009	0.254853
84	ssb	1.37688	1.89977	0.337315	1.17326	1.95794	0.242465
85	nusA	0.864363	0.769905	0.969926	1.30508	1.0639	0.35861
86	sucA	0.907321	2.7936	1.06662	1.41253	1.77373	0.470432
87	nusB	0.772128	0.915606	0.924745	0.179354	0.22973	0.369664
88	sucB	0.898496	0.886113	0.405992	0.516148	0.580939	0.469905
89	rbfA	1.39891	0.900051	1.17543	0.637902	0.372929	0.302766
90	suhB	0.953533	0.852141	1.01053	0.229796	0.124155	0.520198
91	obgE	0.907747	0.190384	0.290975	1.05601	0.32464	0.399184
92	tadA	1.16991	0.953963	1.04519	1.13307	0.850763	0.997642
93	orn	1.05485	0.759701	2.07727	1.1695	1.45828	0.233396
94	thiL	1.25343	1.11215	1.10223	1.9453	0.538641	0.5256
95	parE	0.0306732	0.0416864	0.0694217	1.12007	0.378413	0.463173
96	thrS	0.891905	0.775449	1.82239	1.21533	1.5448	1.71751
97	kdsC	0.954786	2.35564	1.50575	1.56259	0.804434	0.879982
98	def	1.02673	1.1847	1.06653	1.0666	0.326718	0.697666
99	lapA	1.05274	1.07001	1.02004	0.315738	0.620177	0.420656
100	dnaA	1.01051	1.13332	1.14893	1.42944	1.48895	0.390117
101	Empty_Vector	0.95854	1.00211	0.993774	1.02264	0.904886	0.856949
102	Empty_Vector	0.974187	0.99183	0.914817	0.920082	0.894288	0.897329
103	lapB	0.973498	0.944086	0.969545	0.449414	0.366997	0.43196
104	dnaB	0.90555	0.990476	0.997893	0.516222	0.626802	0.412098
105	bamA	0.985299	0.982772	0.957468	0.138812	0.0529588	0.422493
106	dnaC	0.926442	0.924011	0.209869	0.756761	1.84923	0.218458
107	murA	0.95915	0.626215	0.382014	0.452664	0.294171	0.349655
108	dnaE	0.872039	0.577832	0.816049	1.13136	0.314574	0.348747
109	murB	0.784043	0.786146	1.20908	1.36296	0.877704	0.390689
110	dnaG	1.00389	0.494361	0.518938	0.229852	0.206267	0.341605
111	murC	0.885129	0.302456	2.1902	0.757704	1.01288	0.437164
112	dnaN	0.869181	1.02605	0.844036	0.85237	1.21674	1.42744
113	murD	0.933053	0.512184	2.65431	1.01613	1.65902	0.431727
114	dapB	0.963599	0.909883	1.04885	1.68721	0.360266	0.304593
115	murE	1.11597	0.725234	0.832747	0.426356	0.772075	0.0858369
116	dnaX	1.0365	0.899096	1.38295	1.26922	1.35002	0.294558
117	murG	0.956808	0.613261	1.67764	0.403744	1.41164	0.31905
118	dut	1.17868	0.915628	4.27367	1.37971	1.1019	0.396476
119	murI	0.925078	0.885019	1.45643	0.538016	0.298139	0.429285
120	dxr	0.847722	0.788453	1.28986	1.44491	1.45881	1.31553
121	pdxH	1.08818	1.20769	0.882106	0.428413	0.335408	1.04846
122	rpsI	1.12146	1.64692	2.78798	0.709792	0.903625	0.496743
123	pheM	0.970233	1.0865	0.985573	0.728847	0.261468	0.396876
124	tilS	1.61338	1.25691	1.13886	0.994419	0.852762	1.16597
125	pheS	0.85951	0.983835	1.35851	0.723545	0.947499	0.295105
126	tktA	1.19484	1.11303	1.10026	1.04574	0.579331	0.978576
127	pheT	1.0278	2.09452	1.82331	1.03825	1.4567	0.468362
128	tmk	0.911081	0.886286	0.970401	0.631025	1.11242	0.291284
129	ppa	1.17783	1.58227	4.1812	1.92462	1.18685	0.429709
130	tonB	1.31361	0.945263	0.986726	0.86867	0.576667	1.06583
131	prfA	0.866563	0.858445	0.497841	0.676687	0.71154	0.173507
132	topA	0.986892	1.0088	0.942471	0.949079	0.410658	0.265652
133	prfB	0.955214	1.09781	0.315634	0.935963	0.484755	0.534075
134	trmD	1.01615	0.869963	2.34617	0.68976	0.495561	0.429254
135	priB	1.09119	0.713081	4.78988	0.46984	0.514612	0.251493
136	trpS	0.908992	1.06076	0.33951	0.586206	0.944432	0.305837
137	ribE	0.968292	0.701448	0.972419	0.929628	1.21918	0.307141
138	tsaC	0.961446	0.935194	1.0192	0.817784	0.375989	0.536516
139	proS	1.0368	2.51083	1.38845	1.37323	1.51854	0.280825
140	tsaD	1.03673	0.950484	1.03758	0.715442	0.257352	0.437007
141	pth	1.00128	0.967884	0.89481	1.02925	0.903098	1.05992
142	tsaE	1.14466	0.972091	0.988149	0.96125	1.13212	2.24597
143	ptsI	1.13023	0.599058	1.04135	1.50031	1.07756	0.526453
144	tsf	0.734526	1.80208	5.96117	0.642066	2.01791	0.627555
145	uppS	0.956339	0.315528	0.807532	0.749313	0.481255	1.45864
146	rpe	1.013	0.991405	1.06536	1.06289	0.390767	0.813528
147	lspA	0.999805	0.849501	1.25702	1.0643	0.450825	0.38992
148	eno	1.04128	1.00538	0.850901	1.11833	1.44588	0.26969
149	glmS	0.995845	0.922318	0.861341	0.966502	0.8108	0.872642
150	era	0.98642	1.23426	0.718659	0.148358	0.200811	0.353456
151	Empty_Vector	0.871754	1.01598	0.994311	1.02458	0.933806	0.95505
152	ftsH	0.956041	0.859537	0.604615	0.828603	0.908785	0.305371
153	glmU	0.939607	0.914127	1.06838	0.12484	0.123045	0.540981
154	erpA	1.64774	1.4969	1.394	1.62528	1.62645	1.65458
155	glmM	1.13121	1.05394	1.2783	0.646946	0.782979	0.2491
156	fdx	1.07568	1.06568	1.03846	0.917522	0.601022	0.555281
157	murF	0.922734	0.261386	0.307538	0.314685	0.0726459	0.283963
158	hemG	1.02123	0.960158	0.96442	0.979362	0.857974	0.973195
159	gspA	0.929149	0.805025	0.853675	0.750214	0.790064	0.302185
160	fldA	1.22897	0.878919	1.09591	0.637515	1.16247	0.311317
161	accA	0.953464	0.359184	0.317196	0.688606	1.87336	0.482443
162	fmt	0.817682	0.448374	0.455081	0.404049	0.163008	0.249315
163	accB	1.09888	2.17461	2.16917	0.642918	0.773463	0.332933
164	folB	1.05528	0.82432	1.2917	0.579097	0.652507	0.503187
165	accC	1.40647	1.26106	1.14434	0.881597	2.19479	0.407597
166	folC	1.22858	2.74502	3.79414	0.773697	1.11573	0.271463
167	Empty_Vector	1.10395	0.86066	0.925737	0.861755	0.937299	0.928873
168	folD	0.697398	0.810797	7.0058	1.35514	1.18454	0.767095
169	purB	0.907894	1.82352	0.495635	0.582878	1.10938	0.695483
170	tusE	0.984518	0.963174	1.04636	0.926484	0.79345	1.10461
171	pgk	1.05686	1.47868	1.22903	0.748596	1.16494	0.194411
172	tyrS	1.00101	1.01526	0.784395	1.15881	0.943827	0.356507
173	pyrG	0.937251	0.866121	0.871542	0.748968	0.333798	0.313669
174	ubiA	1.30808	1.14402	1.36092	0.699887	2.03544	0.453267
175	racR	1.08258	0.779618	0.769511	0.827976	0.832942	0.330929
176	ubiB	0.882705	0.982051	1.1422	0.587341	0.709337	0.404649
177	rluD	1.21011	0.978793	0.855527	0.551694	0.260631	0.429656
178	ubiD	0.858041	0.938973	1.10744	0.588634	0.458896	0.424681
179	relB	0.960983	1.23007	1.27899	1.45685	1.20304	0.89086
180	ubiE	1.02519	1.19713	1.53773	0.522867	0.674341	0.374332
181	ribD	0.806522	0.980024	1.22813	0.407879	1.08178	0.282672
182	ubiG	1.46244	1.32681	1.33925	2.07732	2.13189	1.12442
183	rplK	0.827744	1.33993	1.63229	0.856008	2.39903	0.336225
184	ubiH	0.831111	0.836397	0.958771	0.359475	0.246506	0.518052
185	ribF	0.79176	0.301075	0.856889	0.803398	0.634271	0.364734
186	frr	0.914451	0.858308	0.921437	1.45526	0.68743	0.348795
187	rimM	1.07666	3.54696	1.15853	1.25057	1.04093	0.258041
188	ubiX	1.03782	1.00286	0.906907	1.1021	0.888398	0.916087
189	rplX	1.03886	0.303167	1.84664	0.97684	1.71265	0.270997
190	valS	1.16684	0.775628	0.833309	1.12509	0.708349	0.953661
191	rnpA	0.956465	0.702932	3.19566	1.1539	1.39237	0.347161
192	wzyE	1.01617	0.232093	0.480835	1.09727	0.152984	0.57989
193	accD	0.973361	1.62946	1.74926	1.08579	0.69726	0.802777
194	hemL	1.06749	1.08253	1.06959	0.846879	0.441234	0.514016
195	plsB	1.09167	1.17815	1.06319	0.987416	0.0719269	0.373007
196	folP	1.33499	1.18896	0.916882	0.656066	0.304577	0.35521
197	plsC	1.02779	1.13746	1.08497	0.910156	0.735166	0.408458
198	holB	1.12787	3.01982	0.745795	0.761909	0.989832	0.485818
199	acpS	0.98591	0.983775	1.17677	0.88943	0.807394	0.465731
200	gapA	0.885868	2.12497	2.0048	0.916082	1.06777	0.554527
201	Empty_Vector	1.05732	1.0563	1.09251	1.02537	1.24618	1.16419
202	dnaT	1.08707	1.79161	0.636934	0.651044	1.19863	0.244468
203	fabA	0.972995	1.05412	1.01563	2.38895	1.04631	0.297513
204	glnS	1.05385	2.68123	0.694069	0.490781	1.2096	0.288367
205	fabB	1.04556	1.01	0.968343	0.0999782	0.084524	0.313518
206	gltX	0.856453	0.941947	1.15128	1.03303	0.884745	0.626742
207	fabD	1.13391	1.09834	1.55404	0.494701	0.535058	0.339727
208	glyQ	0.590046	2.91127	2.42262	0.731095	0.849109	0.367464
209	fabI	0.932707	0.982821	1.06214	1.21166	0.322037	0.335638
210	glyS	0.659776	3.6092	0.77173	2.10721	0.401549	0.120508
211	fabG	1.12578	1.29098	1.75474	1.75214	0.889943	0.366668
212	gmk	1.0116	1.10802	0.699683	3.95904	1.48916	0.366625
213	Empty_Vector	1.11035	1.00776	1.07381	1.07768	1.12772	1.0952
214	grpE	1.1439	1.01712	1.02453	0.836825	0.603564	0.370355
215	fabZ	1.06605	0.633777	0.912439	0.286915	0.162793	0.472131
216	guaA	1.04032	0.943306	0.945706	1.35658	0.585528	0.494897
217	rnt	0.811342	1.01919	1.41624	0.314019	0.22994	0.905302
218	ybeY	0.867503	1.00695	0.993304	0.989977	0.706095	1.16987
219	rplA	1.02272	2.89421	1.73326	1.00426	1.37043	0.448364
220	ycaR	1.01377	1.0762	1.09023	0.646243	0.139959	0.273582
221	rplB	1.05103	0.612434	0.992236	0.909735	0.59808	0.424454
222	ydaE	1.20345	1.07616	1.00059	1.12958	1.05625	1.68153
223	rplC	1.00716	5.43843	3.04094	1.38288	1.24227	0.339123
224	ydaS	1.12222	1.12312	1.06305	1.03386	1.02717	0.945476
225	rplD	1.13061	0.73375	0.859481	0.730522	1.7933	0.393172
226	ydcD	0.843579	1.0376	1.09849	1.04038	1.00624	1.28451
227	tsaB	1.01961	1.08243	1.11676	0.488034	0.626496	1.32845
228	yddL	1.03444	1.19411	1.03165	1.25189	1.23292	1.54458
229	rplF	0.906889	1.46765	0.576768	0.830743	1.92286	0.191174
230	ftsB	0.926037	0.779596	1.80005	3.15088	2.11646	0.534529
231	rplJ	0.861009	2.13955	1.85417	3.20239	2.1547	0.421937
232	ydhL	1.42777	0.966758	0.89989	1.17831	1.05696	1.14638
233	dapD	0.985615	3.24224	3.00278	0.865055	1.61142	0.440449
234	Empty_Vector	0.91299	0.996735	0.892097	1.05076	0.988353	1.01903
235	rplL	1.1233	12.7507	9.14459	1.45169	2.08172	0.43899
236	yffS	1.15829	0.99441	0.965324	1.20414	1.00016	1.60219
237	rplM	1.14587	1.73616	7.40068	1.39059	0.44168	0.356321
238	ygeF	1.03996	0.909342	0.982752	0.961604	0.882094	0.483597
239	rplN	1.05877	1.05929	1.52119	1.20391	0.91444	0.416612
240	ygeG	0.792844	0.904697	0.889698	1.00162	1.24558	0.82199
241	lgt	0.993397	17.3097	3.1514	1.07252	1.1689	0.829791
242	gyrB	1.08513	3.8876	7.42991	1.25501	0.811747	0.37997
243	pssA	0.964555	0.742139	0.806795	0.513393	0.267092	0.348905
244	hda	1.05356	1.02253	0.954742	0.893847	0.92307	0.73383
245	pgsA	1.3356	1.26765	1.12007	1.27295	0.209171	0.325784
246	hemA	1.12548	2.0174	0.615663	0.833077	0.632852	0.320673
247	yejM	0.908559	1.10282	0.92887	0.777745	0.858564	0.304831
248	der	0.963499	0.371228	0.182984	0.569642	0.680132	0.368495
249	rpoH	0.92196	1.03525	1.10496	1.56738	0.804358	0.460225
250	hemC	0.873323	3.48463	2.48131	0.845199	0.763543	0.354834
251	Empty_Vector	0.912341	1.12698	1.1615	1.1092	1.22274	1.35331
252	igaA	1.07291	0.799447	0.842986	0.323501	0.274085	0.4194
253	rpoE	1.015	1.12321	1.88864	0.380479	0.495531	0.153539
254	hemD	1.19727	1.37639	4.68525	0.380949	0.506704	0.233821
255	rpoD	1.47397	1.26128	1.30456	0.643728	0.546538	0.255559
256	hemE	0.923677	1.00516	1.77393	0.76929	0.6377	0.445929
257	degS	0.943854	0.97143	0.952116	0.744334	0.356234	0.541742
258	iscU	0.768691	0.963252	0.956508	0.719456	0.438534	0.497032
259	Empty_Vector	1.01076	1.11196	1.06523	1.02891	1.08476	1.14598
260	hemH	1.26394	1.17066	1.18926	0.678213	0.5648	0.197145
261	rne	1.36592	1.48181	2.17002	1.10707	0.90459	0.553051
262	ispD	1.18681	0.99379	1.21675	0.564273	0.744351	0.41718
263	groL	0.993931	0.835319	1.0869	0.694513	0.535959	0.392927
264	higA	0.860527	0.895176	1.11951	0.31246	0.18749	0.348392
265	rplO	0.968772	1.67719	1.21271	1.15346	0.971043	0.983291
266	ygeN	0.919154	0.954086	0.941374	0.995769	0.965579	1.08665
267	rpsD	1.15098	2.97118	0.641493	1.03099	0.881056	0.315805
268	coaD	1.02272	1.53088	4.19846	0.304269	0.242176	0.22991
269	rplQ	1.10632	1.20279	0.544655	0.887815	2.71863	0.379201
270	yidC	1.11716	0.573678	0.509083	0.815119	0.675262	0.362214
271	rplR	0.731309	0.701304	1.04946	0.353722	0.400384	0.383582
272	can	0.960205	0.95974	1.0399	1.01562	1.31104	1.20004
273	rplS	0.958546	1.05523	0.942215	0.952626	0.97136	1.11455
274	mrdA	0.646484	0.448605	0.272059	0.0689217	0.0795577	0.149756
275	rplT	0.971932	1.72244	0.189465	0.199421	0.212003	0.283343
276	prs	1.10359	1.21556	0.349352	0.529503	0.941158	0.499214
277	rplU	1.13868	1.84034	0.686895	0.853922	1.44082	0.830989
278	mukB	0.886631	0.911384	0.893233	0.889142	1.10966	1.06974
279	rplV	1.14803	16.3428	9.57655	5.59857	11.1899	0.420128
280	yedN	0.862492	0.854103	0.82186	0.982359	0.887869	0.755066
281	rplW	1.00344	0.782707	0.796499	0.413133	1.38196	0.284112
282	fabH	1.28448	1.56064	0.800605	0.928815	1.34566	0.25965
283	ykfM	0.936527	0.885483	0.90206	1.00247	0.821894	0.876731
284	infC	1.10832	0.937226	0.407426	1.00314	0.411891	0.469309
285	rplY	0.687457	0.45348	0.60504	0.81782	0.906264	0.258753
286	ymiB	1.24454	1.05523	1.07395	1.05212	1.02029	1.02711
287	rpmA	1.11352	0.731938	0.712562	1.45603	0.935446	0.447481
288	yihA	0.969407	0.824489	0.891069	0.848427	0.544343	0.585511
289	iraM	1.02877	1.10315	1.26898	1.12815	0.998368	1.42722
290	hipB	0.974572	0.997231	0.981155	0.978667	0.732616	0.539684
291	rseP	1.04466	0.626423	0.404854	0.0964203	0.0644853	0.0782626
292	hisS	0.852789	0.836591	0.841428	0.889284	0.553745	0.310495
293	safA	1.07785	1.00437	0.969523	0.983694	0.979214	1.01803
294	holA	1.2315	0.41751	1.14352	0.695404	0.741139	0.258054
295	ftsL	0.86452	0.50431	2.34425	0.389846	1.02029	0.292328
296	pyrH	1.01381	0.80505	0.928466	0.825984	2.14261	0.525484
297	ftsI	0.792449	0.977328	2.50862	0.795099	2.55852	0.680689
298	holD	1.1154	0.686607	0.520223	0.428709	0.165066	0.303623
299	ftsA	0.952859	0.620264	0.257608	0.456961	0.344821	0.480974
300	hscA	1.18647	0.95163	1.00114	0.67346	0.42009	0.500878
301	Empty_Vector	0.981267	0.953842	0.977344	0.928451	0.980872	1.21681
302	mukE	1.036	0.943739	0.933982	0.846572	1.06105	0.814025
303	ftsW	1.47605	1.30296	1.15634	0.688431	1.6116	0.623364
304	ihfA	0.56294	0.445082	0.572565	0.292063	0.262532	0.0935216
305	Empty_Vector	1.08814	0.919937	0.910729	0.885831	0.880088	0.704381
306	ileS	0.974291	0.228266	0.685937	1.02988	0.725174	0.360296
307	ftsY	1.10163	0.191056	0.910745	0.728308	1.67862	0.516295
308	infA	0.972259	0.467711	1.5916	0.38564	0.585935	0.397767
309	ftsZ	0.81542	1.05518	1.24623	1.021	0.716678	0.468644
310	infB	0.553724	1.56199	1.34034	1.68175	1.54994	0.228349
311	groS	1.02082	0.850643	1.06643	0.878568	0.460125	0.215086
312	mraY	0.715344	0.540101	1.42	1.12185	0.992694	0.396443
313	rpmB	1.07306	1.04877	2.37596	1.57759	0.777518	0.85676
314	mukF	1.10283	1.18112	1.13339	1.13181	0.827465	1.02388
315	rpmC	1.09756	0.16203	0.254491	0.42265	0.182126	0.33504
316	dfp	1.00597	4.77801	4.36947	5.55601	2.74988	0.376836
317	yqcG	1.03225	1.02653	1.00026	0.892105	0.884037	0.753123
318	ffh	0.978114	0.66561	0.526688	0.782368	1.48272	0.253779
319	rpmD	1.06274	1.47232	1.20262	0.684578	3.29025	0.287828
320	folE	1.12187	5.19796	4.13355	1.40213	0.729589	0.380254
321	rpmF	1.2003	0.912489	0.889948	0.717576	0.578937	0.752675
322	prmC	1.76966	1.6376	2.7523	1.25499	1.24346	0.33723
323	rpmH	1.07392	0.0878078	0.155672	0.174293	0.106476	0.330442
324	rbfA	1.13022	0.599969	0.440519	0.389724	0.292409	0.452599
325	rpmI	0.920461	0.292413	0.155637	0.277551	0.169561	0.25956
326	rplE	1.01169	1.90807	0.651772	0.955445	0.935129	0.541945
327	rpoA	1.24867	0.14899	0.123578	0.187063	0.131465	0.240304
328	rplK	0.833118	0.521118	0.327606	1.02788	0.186687	0.391803
329	rpoC	1.01917	0.722576	2.22683	1.42999	0.985833	0.265876
330	rplP	1.3822	0.659134	0.307256	1.58241	1.02984	0.228455
331	rpsA	1.09534	0.572536	5.70577	2.02708	0.618735	0.315245
332	rplX	1.1701	0.325851	3.61529	0.492832	0.524465	0.162145
333	rpsC	0.81452	0.192647	0.463379	0.32595	0.0773469	0.148029
334	rpsG	1.23517	1.09598	5.0446	1.93533	0.645574	0.148577
335	rpsE	1.09152	0.605402	0.444312	0.692303	0.553289	0.596981
336	rpsS	1.1327	1.67836	1.68765	2.26276	0.971966	0.366283
337	mreB	0.864225	1.05536	1.12173	0.0906159	0.0590565	0.116331
338	iscS	1.07438	1.09964	1.04114	1.06926	0.521289	0.598219
339	mreC	1.00875	0.944295	0.750173	0.122428	0.0729934	0.146563
340	nusG	1.12	1.46685	1.85248	1.40184	0.51831	0.473211
341	mreD	1.69675	1.50532	1.25791	0.869585	0.870615	0.537257
342	ispA	1.05704	1.0793	1.18115	1.26779	1.0273	1.06987
343	ribA	1.06605	1.20667	2.11472	0.720476	0.986527	0.378853
344	ispB	1.01351	1.06395	1.00629	1.09907	0.62656	0.770058
345	murJ	0.994164	0.957686	1.0395	0.879612	1.00208	0.879658
346	rho	0.851565	0.222343	0.133944	0.168665	0.123227	0.256249
347	folA	0.958488	3.07348	3.44593	0.798841	1.2188	0.295919
348	ispE	1.18657	1.08877	1.13764	0.798066	0.25052	0.449338
349	bioA	1.11297	0.963158	1.08563	0.912519	0.9075	0.543047
350	ispF	1.07502	0.982008	1.19472	0.381854	0.384089	0.321084
351	Empty_Vector	1.07918	0.913947	0.864083	0.814272	0.793135	0.645721
352	lepB	1.23345	0.150784	0.409006	0.40799	0.383952	0.381856
353	rpsB	1.14762	1.70823	2.34791	0.96627	1.40888	0.49401
354	ispG	1.13548	0.891129	1.05852	1.00867	0.386607	0.19203
355	adk	1.23864	0.48454	0.418801	1.35738	0.883705	0.227177
356	ispH	1.18952	0.331978	0.819384	0.991868	0.600358	0.260679
357	glyA	1.24847	0.637413	2.28328	0.671976	0.881207	0.376723
358	ispU	1.10791	0.993474	4.26883	2.77625	1.31957	0.246717
359	bamD	1.04953	0.9624	1.05391	0.967072	0.947857	0.57904
360	Empty_Vector	0.984504	0.827223	0.921531	0.991588	1.021	0.849774
361	rpsF	0.880609	4.114	13.6454	1.12564	0.759723	0.931547
362	ydfO	1.01147	1.0205	0.774621	0.862211	0.786102	0.422304
363	ydfO	0.798469	0.80902	0.784068	0.816245	0.897463	0.588291
364	lexA	0.896415	0.959542	0.566872	0.516961	0.511121	0.298346
365	rpsH	0.667343	0.474042	1.99253	1.84299	1.33298	0.405954
366	dicA	0.890731	0.876354	0.925507	1.38529	0.69422	0.38335
367	rpsJ	0.808731	2.22786	2.3188	1.16162	1.45188	0.678658
368	coaE	0.775189	1.09289	1.05708	0.825457	0.834331	0.613341
369	rpsK	0.894153	0.699865	1.56482	0.851856	1.13279	0.302457
370	ribC	1.02603	1.28132	1.13509	1.01821	0.615402	0.540666
371	rpsL	0.968588	22.3906	10.1125	0.91222	1.25915	0.349089
372	rpsM	1.10513	1.11816	0.530289	1.08353	1.30353	0.286242
373	rpsN	1.19873	0.93267	0.735629	0.492866	0.403703	0.336285
374	rpsO	0.928375	6.16219	34.5405	0.988865	0.572675	0.291725
375	ygfZ	0.894069	0.873971	1.08896	0.874198	0.821838	0.404994
376	yncH	1.06576	1.03642	1.1064	0.813659	0.867494	0.66145
377	Empty_Vector	0.899826	0.765328	0.910152	0.900665	0.90654	0.786817

## Sheet: Table_S8
Table S8: Minimum inhibitory concentration (µg/mL) of compounds against E. coli carrying the empty vector or expressing VIM-2 in M9 minimal media.
Compound	Empty	VIM-2
(±)-Nargenin	>50	>50
2-Nitrofuran	>50	>50
6-Amino-nicotinamid	0.78125	0.78125
6-Azauracil	0.195312	0.0976562
A22	>64	2
Amphotericin B	>100	>100
Ampicillin	3.125	3.125
Apramycin	8	2
Azithromycin	4	0.5
Bacitracin	>128	>128
Benomyl	>50	>50
Benzamidine	>100	>100
Cefdinir	0.0976562	0.0488281
Cefmetazole	1.5625	0.390625
Cefpirome	0.0244141	0.0244141
Cefsulodin	64	4
Ceftriaxone	0.0244141	0.012207
Cephalothin	3.125	3.125
Cephradine	12.5	12.5
CHIR090	0.195312	0.0976562
Cinoxacin	6.25	3.125
Ciprofloxacin	0.03125	0.03125
Cisplatin	12.5	3.125
Clarithromycin	>128	32
Clofoctol	>100	25
Clotimazole	>100	>100
Cloxacillin	>100	100
Daptomycin	>50	>50
Deferpirome	100	100
Diclofenac	>100	>100
Dirithromycin	64	8
Doxycycline	3.125	3.125
Erythromycin	>128	16
Flurazolidone	0.78125	0.390625
Fosfomycin	25	25
Fusidic acid	>128	64
G418 disulfate	>128	>128
Gentamicin	0.0976562	0.0976562
Glyphosphate	>40	>40
Hydroxyurea	>50	>50
Hygromycin B	64	8
L-Norleucine	12.5	6.25
Lactobionic acid	>200	>200
Lamotrigine	128	16
Lincomycin	>100	>100
Linezolid	>128	32
Mecillinam	0.390625	0.78125
Meropenem	0.78125	0.78125
Minocycline	1.5625	1.5625
Nalidixic acid	32	8
Neomycin	100	>100
Nitrofurantoin	3.125	3.125
Novobiocin	>128	64
Oxacillin	>50	>50
Oxytetracycline	1.5625	1.5625
Paromycin	>100	>100
Penicillin G	50	25
Plazomycin	0.390625	0.195312
Polymyxin B	0.390625	0.390625
Propomadide	50	50
Rifamixin	8	4
Roxithromycin	>50	>50
Sparfloxacin	0.390625	0.390625
Spectinomycin	50	50
Spiramycin	128	128
Streptomycin	3.125	0.78125
Sulfameter	0.78125	0.390625
Sulfamethazine	1.5625	0.78125
Sulfamethoxazole	0.195312	0.195312
Terbinafine	>50	>50
Thiamphenicol	50	25
Thiostrepton	>128	32
Tobramycin	1.5625	1.5625
Triclosan	0.195312	0.195312
Trimethoprim	0.78125	0.78125
Tylosin	>50	>50
Vancomycin	128	128
*VIM-2 does not confer resistance to beta-lactams in M9 minimal media based on the lack of zinc
